# Supplementary material for: Cancer Prevention: Knowledge, Attitudes and Lifestyle Cancer-Related Behaviors among Adolescents in Italy
Source: PubMed Central journal article supplement (PMC7698075; doi:10.3390/ijerph17228294), 2020-11-10
Supplement: ijerph-17-08294-s001.pdf [file ijerph-17-08294-s001.pdf]

## S1 SUPPLEMENTARY FILE

### QUESTIONNAIRE

#### Section A. SOCIO-DEMOGRAPHICS

**A1.** Gender  Male  Female      **A2.** Age \_\_\_\_\_      **A3.** Height\_\_\_\_\_cm      **A4.** Weight \_\_\_\_\_Kg

**A5.** What is the occupation of your father? \_\_\_\_\_

**A6.** What is the occupation of your mother?\_\_\_\_\_

**A7.** What is the highest education degree of your father? \_\_\_\_\_

**A8.** What is the highest education degree of your mother? \_\_\_\_\_

**A9.** Do you know anyone who has had cancer?      No       Yes, who? (specify)\_\_\_\_\_

**A10.** Would you say your health is ...       Excellent     Good     Discrete     Poor

#### Section B. KNOWLEDGE RELATED TO CANCER

**B1.** Cancer is a disease caused by uncontrollable cell growth and can spread to various parts of the body.

Have you ever heard of it? (more than one answer allowed) No    Yes, by who?    Tv     Internet

Physicians     School/teacher     Family     Other (specify)\_\_\_\_\_

**B2.** On your opinion, which of the following factors can increase the chance of developing cancer?

|                                             | Yes                      | No                       | I don't know             |
|---------------------------------------------|--------------------------|--------------------------|--------------------------|
| Smoking                                     | <input type="checkbox"/> | <input type="checkbox"/> | <input type="checkbox"/> |
| Passive smoking                             | <input type="checkbox"/> | <input type="checkbox"/> | <input type="checkbox"/> |
| Overweight/Obesity                          | <input type="checkbox"/> | <input type="checkbox"/> | <input type="checkbox"/> |
| Poor physical activity                      | <input type="checkbox"/> | <input type="checkbox"/> | <input type="checkbox"/> |
| Low fruit/vegetables intake                 | <input type="checkbox"/> | <input type="checkbox"/> | <input type="checkbox"/> |
| Daily intake of sweets and/or sugary drinks | <input type="checkbox"/> | <input type="checkbox"/> | <input type="checkbox"/> |
| High fat diets                              | <input type="checkbox"/> | <input type="checkbox"/> | <input type="checkbox"/> |
| Alcohol drinking                            | <input type="checkbox"/> | <input type="checkbox"/> | <input type="checkbox"/> |
| Sun exposure without sun protection         | <input type="checkbox"/> | <input type="checkbox"/> | <input type="checkbox"/> |
| Use of tanning lamps                        | <input type="checkbox"/> | <input type="checkbox"/> | <input type="checkbox"/> |

**B3.** On your opinion, at what age can cancers appear? (more than one answer allowed)

At any age  After 18 years  Between 18 and 65 years  After 65 years

**B4.** On your opinion, which are the most frequent cancers in Italy? (more than one answer allowed)

Colorectal cancer       Cancer of the uterus       Prostate cancer  
 Liver cancer       Breast cancer       Stomach cancer       Lung cancer

**B5.** On your opinion, which of the following cancers are associated with smoking? (more than one answer allowed)       Lung cancer       Oral cancer       Esophageal tumor

Stomach cancer       Colorectal cancer       Bladder cancer  
 Ovarian cancer       Leukemia

**B6.** On your opinion, which of the following cancers are associated with alcohol consumption? (more than one answer allowed)

Mouth and throat cancer       Colorectal cancer       Breast cancer       Liver cancer

### Section C. ATTITUDES RELATED TO CANCER

**C1.** How much worried are you about developing cancer? (1 not at all worried; 10 very worried)

1    2    3    4    5    6    7    8    9    10

**C2.** Cancers are serious diseases       Agree       Uncertain       Disagree

**C3.** Cancers are preventable diseases       Agree       Uncertain       Disagree

### Section D. LIFESTYLE BEHAVIORS RELATED TO CANCER

**D1.** Do you currently smoke cigarettes?       No (go to D3.)       Yes

**D2.** In the previous month, how many days did you smoke cigarettes?

None     1-2     3-5     6-9     10-19     20-29     All 30 days

**D3.** In the last week, how many days did you do perform physical activity for a total of at least 60 minutes a day?

Never     1 day     2 days     3 days     4 days     5 days     6 days     7 days

**D4.** Generally, in your leisure time, how much time a day do you spend sitting, watching television, using a computer, playing videogames, or doing other activities while sitting?

Half an hour     1 to 2 hours     3 to 4 hours     5 to 6 hours     7 to 8 hours     More than 8 hours

**D5.** How many times per day do you usually eat fruit?

Never     1 times per day     2 times per day     3 times per day     4 times per day     5 or more times per day

**D6.** How many times per day do you usually eat vegetables?

Never     1 times per day     2 times per day     3 times per day     4 times per day     5 or more times per day

**D7.** How many times per day do you consume sugary drinks?

Never  1 times per day  2 times per day  3 times per day  4 times per day  5 or more times per day

**D8.** How often do you consume alcoholic drinks?

Never  Less than once a month  Once a month  2-4 times a month  2-3 times a week

4 or more times a week

**D9.** On the days you drink, how many alcoholic beverages do you consume on average?

1-2  3-4  5-6  7-9  10 or more

**D10.** How often do you drink 6 or more drinks in a single occasion?

Never  Less than once a month  Once a month  Once a week  Every day or almost

**D11.** In the last six months have you had sun exposure without adequate protection (eg. sunscreen)?  No  Yes

**D12.** Have you used tanning lamps in the past six months?  No  Yes

**D13.** Have you had the Papillomavirus (HPV) vaccination?  No  Yes  I don't know

### **Section E. INFORMATION**

**E1.** Do you receive information on cancer prevention?

No  Yes, from what sources? (more than one answer allowed)  Family  Physicians  
 School/teacher  Scientific journals  Internet  Other (specify)

---

**E2.** Would you like more to receive information on cancer prevention?  No  Yes

## S2 SUPPLEMENTARY FILE

### Variables included in the logistic regression models with related categories

#### MODEL 1: Good knowledge about risk factors for cancer

| <b>Independent variables</b>                                 | <b>Code</b>                   |
|--------------------------------------------------------------|-------------------------------|
| Age, in years (ordinal)                                      | 13-15=1<br>16-17=2<br>18-20=3 |
| Gender                                                       | male=0<br>female=1            |
| Both parents employed                                        | no=0<br>yes=1                 |
| Personal, familiar, or friend history of cancer              | no=0<br>yes=1                 |
| Physicians as sources of information about cancer prevention | no=0<br>yes=1                 |
| Need of additional information about cancer prevention       | no=0<br>yes=1                 |

**MODEL 2:** Being current smokers

| <b>Independent variables</b>                                                                                                                        | <b>Code</b>                                               |
|-----------------------------------------------------------------------------------------------------------------------------------------------------|-----------------------------------------------------------|
| Age, in years (ordinal)                                                                                                                             | 13-15=1<br>16-17=2<br>18-20=3                             |
| Gender                                                                                                                                              | male=0<br>female=1                                        |
| Personal, familiar, or friend history of cancer                                                                                                     | no=0<br>yes=1                                             |
| Physicians as sources of information about cancer prevention                                                                                        | no=0<br>yes=1                                             |
| Education level of at least one parent                                                                                                              | lower than college degree=0<br>college degree or higher=1 |
| At least one parent in the healthcare sector                                                                                                        | no=0<br>yes=1                                             |
| Having heard the definition of cancer from a physician                                                                                              | no=0<br>yes=1                                             |
| Knowledge of the most frequent cancers in Italy and of those related to smoking and alcohol use                                                     | no=0<br>yes=1                                             |
| Knowledge that insufficient intake of fruits/vegetables, daily intake of sweets and/or sugary drinks, and high fat diets are risk factor for cancer | no=0<br>yes=1                                             |
| Knowledge that poor physical activity and overweight/obesity are risk factor for cancer                                                             | no=0<br>yes=1                                             |
| Smoking is a risk factor for cancer                                                                                                                 | no=0<br>yes=1                                             |
| Self-reported health status                                                                                                                         | unsatisfactory (<5)=0<br>satisfactory (5)=1               |
| Perception of risk of developing cancer                                                                                                             | low (1-7)=0<br>high (8-10)=1                              |
| Consuming alcohol                                                                                                                                   | no=0<br>yes=1                                             |
| Consuming at least 5 servings of fruits and vegetables per day                                                                                      | no=0<br>yes=1                                             |
| Having a daily intake of sugary drinks                                                                                                              | no=0<br>yes=1                                             |
| Being physically active                                                                                                                             | no=0<br>yes=1                                             |

**MODEL 3: Being physically active**

| <b>Independent variables</b>                                                                                                                        | <b>Code</b>                                                        |
|-----------------------------------------------------------------------------------------------------------------------------------------------------|--------------------------------------------------------------------|
| Age, in years (ordinal)                                                                                                                             | 13-15=1<br>16-17=2<br>18-20=3                                      |
| Gender                                                                                                                                              | male=0<br>female=1                                                 |
| Personal, familiar, or friend history of cancer                                                                                                     | no=0<br>yes=1                                                      |
| Physicians as sources of information about cancer prevention                                                                                        | no=0<br>yes=1                                                      |
| Education level of at least one parent                                                                                                              | lower than<br>college<br>degree=0<br>college degree<br>or higher=1 |
| At least one parent in the healthcare sector                                                                                                        | no=0<br>yes=1                                                      |
| Having heard the definition of cancer from a physician                                                                                              | no=0<br>yes=1                                                      |
| Knowledge of the most frequent cancers in Italy and of those related to smoking and alcohol use                                                     | no=0<br>yes=1                                                      |
| Knowledge that insufficient intake of fruits/vegetables, daily intake of sweets and/or sugary drinks, and high fat diets are risk factor for cancer | no=0<br>yes=1                                                      |
| Knowledge that physical activity and overweight/obesity are risk factor for cancer                                                                  | no=0<br>yes=1                                                      |
| Smoking is a risk factor for cancer                                                                                                                 | no=0<br>yes=1                                                      |
| Self-reported health status                                                                                                                         | unsatisfactory<br>(<5)=0<br>satisfactory<br>(5)=1                  |
| Perception of risk of developing cancer                                                                                                             | low (1-7)=0<br>high (8-10)=1                                       |
| Consuming alcohol                                                                                                                                   | no=0<br>yes=1                                                      |
| Consuming at least 5 servings of fruits and vegetables per day                                                                                      | no=0<br>yes=1                                                      |
| Having a daily intake of sugary drinks                                                                                                              | no=0<br>yes=1                                                      |
| Being physically active                                                                                                                             | no=0<br>yes=1                                                      |
| Being current smokers                                                                                                                               | no=0<br>yes=1                                                      |
